# Supplementary material
Source: PubMed Central journal article supplement (PMC6245203)

SUPPLEMENTARY DATA

**Online-Only Supplemental Material**  
**Hearing Impairment and Type 1 Diabetes in the DCCT/EDIC Cohort**

David S. Schade, Gayle M. Lorenzi, Barbara H. Braffett, Xiaoyu Gao, Kathleen E. Bainbridge, Annette Barnie, Karen J. Cruickshanks, Dayna Dalton; Lisa Diminick, Rose Gubitosi-Klug, John R. Kramer, John M. Lachin, Mary E. Larkin, Catherine C. Cowie, and the DCCT/EDIC Research Group

This document presents supplemental materials cited in the text of the main manuscript

SUPPLEMENTARY DATA

**Supplementary Table S1.** Association of Speech-frequency and High-frequency PTA in Participants with Type 1 Diabetes and Spousal Controls

| Hearing Impairment                        | Paired Participant with Type 1 Diabetes and Spousal Controls (n=283 pairs) |              | Participants with Type 1 Diabetes (n=1150) vs. Spousal Controls (n=283) |              |
|-------------------------------------------|----------------------------------------------------------------------------|--------------|-------------------------------------------------------------------------|--------------|
|                                           | Unadjusted                                                                 | Adjusted     | Unadjusted                                                              | Adjusted     |
| <b>Worse ear</b>                          |                                                                            |              |                                                                         |              |
| Speech-frequency                          | -0.81 ± 1.02                                                               | -1.23 ± 0.97 | -0.15 ± 0.92                                                            | -0.01 ± 0.86 |
| High-frequency                            | 0.62 ± 1.63                                                                | -0.49 ± 1.44 | 0.95 ± 1.34                                                             | 1.11 ± 1.17  |
| <b>Better ear</b>                         |                                                                            |              |                                                                         |              |
| Speech-frequency                          | 0.60 ± 0.69                                                                | 0.32 ± 0.65  | 0.90 ± 0.56                                                             | 1.07 ± 0.53  |
| High-frequency                            | 2.03 ± 1.36                                                                | 1.14 ± 1.22  | 1.52 ± 1.05                                                             | 1.71 ± 0.94  |
| <b>Average (left/right)</b>               |                                                                            |              |                                                                         |              |
| Speech-frequency                          | -0.11 ± 0.80                                                               | -0.45 ± 0.75 | 0.37 ± 0.68                                                             | 0.53 ± 0.63  |
| High-frequency                            | 1.33 ± 1.45                                                                | 0.32 ± 1.28  | 1.23 ± 1.16                                                             | 1.42 ± 1.01  |
|                                           |                                                                            |              |                                                                         |              |
| <b>Overall Hearing (Speech- + High-)*</b> | 0.61 ± 1.08                                                                | -0.07 ± 0.96 | 0.82 ± 0.88                                                             | 0.96 ± 0.78  |

Data are beta estimates ± SE from unadjusted and age and gender adjusted linear regression models.

\* Overall test for any hearing loss (speech- and high-frequency). Models were adjusted for type of hearing loss (speech-frequency worse ear, speech-frequency better ear, high-frequency worse ear, high-frequency better ear).

SUPPLEMENTARY DATA

**Supplementary Table S2.** Odds of Speech-frequency and High-frequency Hearing Impairment per 10% increase in HbA1c in Participants with Type 1 Diabetes

| Unadjusted Models    |                   |                   |                   |                   |                              | Adjusted Models   |                   |                   |                   |                              |
|----------------------|-------------------|-------------------|-------------------|-------------------|------------------------------|-------------------|-------------------|-------------------|-------------------|------------------------------|
| Hearing Impairment   | At DCCT Entry     | Mean DCCT         | Mean EDIC         | Current           | Time-weighted Mean DCCT/EDIC | At DCCT Entry     | Mean DCCT         | Mean EDIC         | Current           | Time-weighted Mean DCCT/EDIC |
| Odds Ratios (95% CI) |                   |                   |                   |                   |                              |                   |                   |                   |                   |                              |
| <b>Both ears</b>     |                   |                   |                   |                   |                              |                   |                   |                   |                   |                              |
| Speech-frequency     | 0.93 (0.83, 1.04) | 0.94 (0.84, 1.06) | 1.12 (0.96, 1.30) | 1.02 (0.90, 1.16) | 1.08 (0.92, 1.27)            | 0.95 (0.84, 1.07) | 1.01 (0.90, 1.14) | 1.18 (1.00, 1.39) | 1.09 (0.95, 1.26) | 1.17 (0.98, 1.39)            |
| High-frequency       | 0.99 (0.92, 1.05) | 0.94 (0.88, 1.01) | 1.09 (0.99, 1.20) | 1.00 (0.93, 1.09) | 1.05 (0.95, 1.16)            | 1.04 (0.96, 1.12) | 1.02 (0.94, 1.11) | 1.14 (1.03, 1.27) | 1.07 (0.98, 1.18) | 1.14 (1.02, 1.27)            |
| <b>Either ear</b>    |                   |                   |                   |                   |                              |                   |                   |                   |                   |                              |
| Speech-frequency     | 1.01 (0.93, 1.10) | 1.02 (0.94, 1.12) | 1.24 (1.10, 1.39) | 1.11 (1.01, 1.23) | 1.22 (1.08, 1.38)            | 1.04 (0.96, 1.14) | 1.10 (1.01, 1.21) | 1.30 (1.14, 1.47) | 1.18 (1.07, 1.31) | 1.32 (1.15, 1.50)            |
| High-frequency       | 1.02 (0.96, 1.09) | 0.99 (0.92, 1.06) | 1.12 (1.02, 1.23) | 1.05 (0.97, 1.13) | 1.10 (1.00, 1.21)            | 1.09 (1.01, 1.17) | 1.08 (1.00, 1.17) | 1.17 (1.06, 1.29) | 1.12 (1.03, 1.22) | 1.19 (1.07, 1.33)            |

Data are odds ratios and 95% confidence intervals from unadjusted and age and gender adjusted logistic regression models. Odds ratios are presented per 10% increase in HbA1c.

SUPPLEMENTARY DATA

**Supplemental Table S3.** Prevalence of Speech-frequency and High-frequency Hearing Impairment in Participants with Type 1 Diabetes and Time-weighted HbA1c <7% (53 mmol/mol) and Spousal Controls

| Hearing Impairment | Participants with Type 1 Diabetes and HbA1c <7% (n=159) | Spousal Controls (n=283) | Unadjusted Models    | Participants with Type 1 Diabetes and HbA1c <7% (n=159) | Spousal Controls (n=283) | Adjusted Models      |
|--------------------|---------------------------------------------------------|--------------------------|----------------------|---------------------------------------------------------|--------------------------|----------------------|
|                    | Crude Prevalence No. (%)                                |                          | Odds Ratios (95% CI) | Adjusted Estimated Prevalence (%)                       |                          | Odds Ratios (95% CI) |
| <b>Both ears</b>   |                                                         |                          |                      |                                                         |                          |                      |
| Speech-frequency   | 15 (9)                                                  | 22 (8)                   | 1.3 (0.7, 2.5)       | 8                                                       | 6                        | 1.3 (0.6, 2.5)       |
| High-frequency     | 47 (30)                                                 | 93 (33)                  | 0.9 (0.6, 1.4)       | 26                                                      | 30                       | 0.8 (0.5, 1.3)       |
| <b>Either ear</b>  |                                                         |                          |                      |                                                         |                          |                      |
| Speech-frequency   | 20 (13)                                                 | 53 (19)                  | 0.6 (0.4, 1.1)       | 10                                                      | 16                       | 0.6 (0.3, 1.0)       |
| High-frequency     | 73 (46)                                                 | 135 (48)                 | 0.9 (0.6, 1.4)       | 44                                                      | 48                       | 0.9 (0.6, 1.3)       |

Data are prevalence estimates No. (%) and odds ratios (participants with type 1 diabetes vs. spousal controls) and 95% confidence intervals from unadjusted and age and gender adjusted logistic regression models.

SUPPLEMENTARY DATA

**Supplementary Figure S1.** Distribution of (A) speech-frequency and (B) high-frequency PTA in participants with type 1 diabetes and spousal controls.

(A)

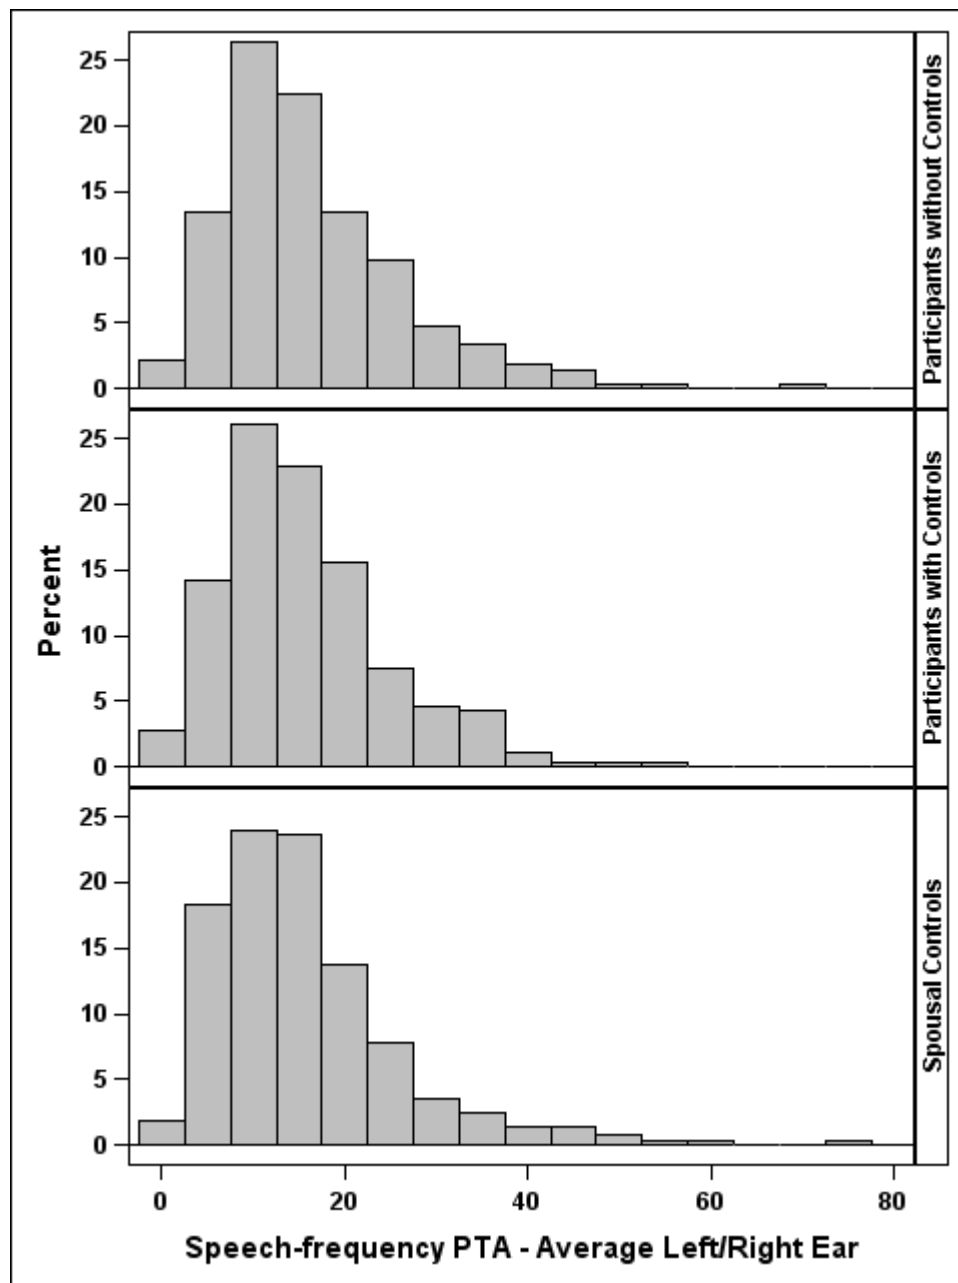

SUPPLEMENTARY DATA

(B)

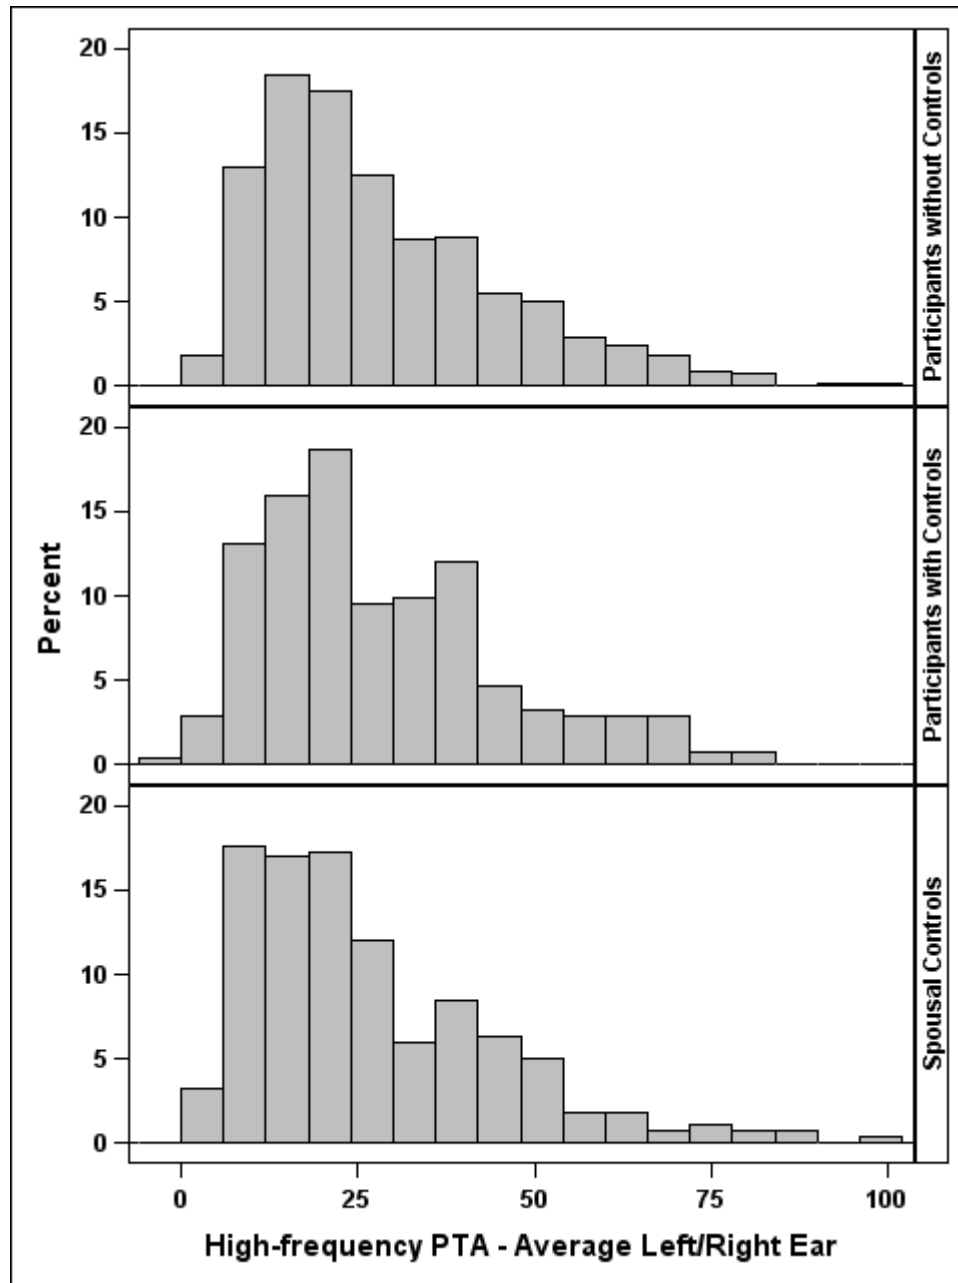

## SUPPLEMENTARY DATA

**Supplementary Figure S2.** Probability of (A) speech-frequency and (B) high-frequency hearing impairment in either ear as a function of time-weighted mean DCCT/EDIC HbA1c in participants with type 1 diabetes. The dark line represents the predicted probability of hearing impairment at a given level of HbA1c; the shaded area is the 95% confidence interval for the predicted probability.

### (A) Speech-frequency

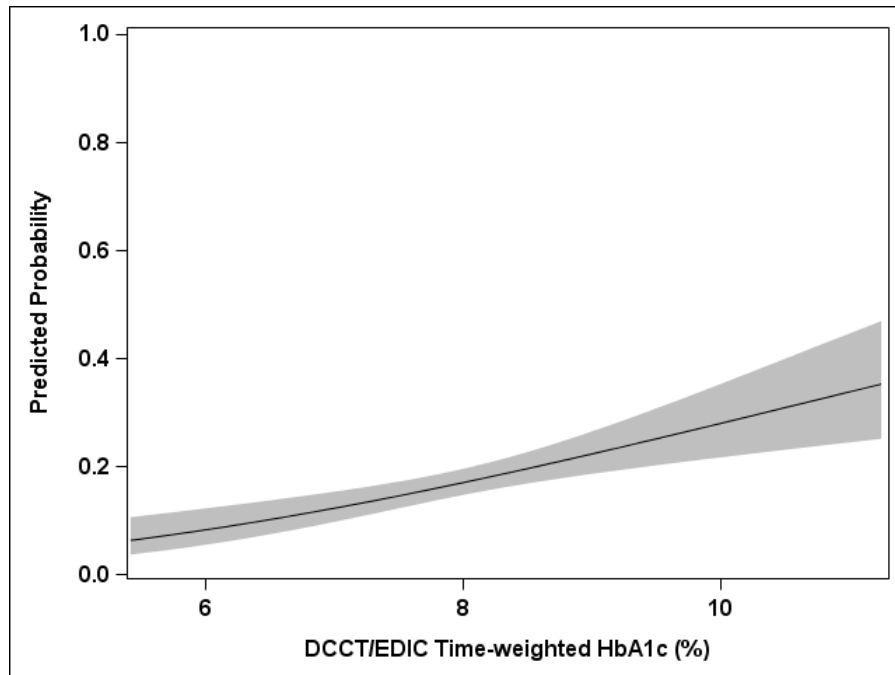

### (B) High-frequency

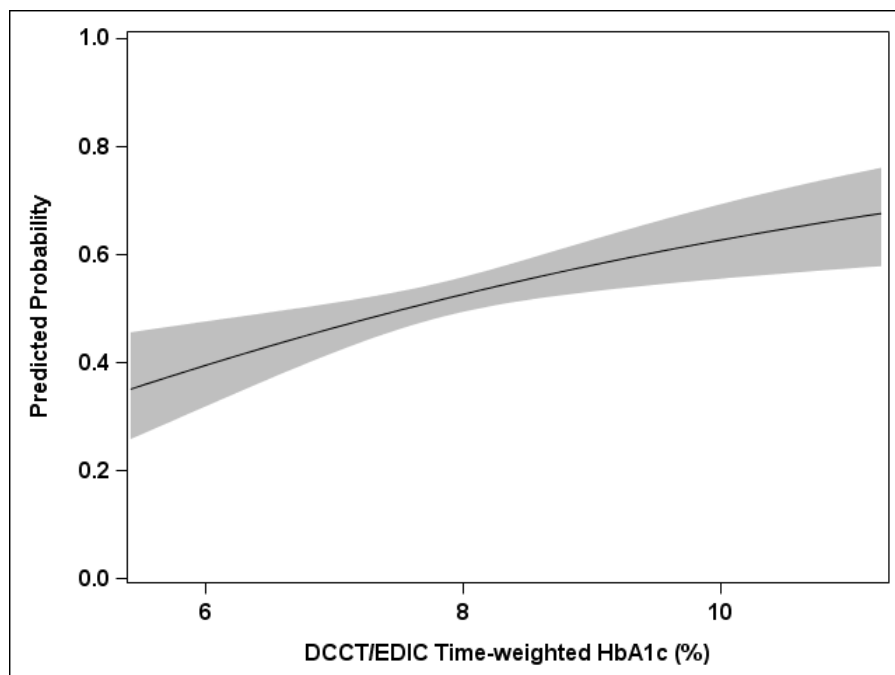

Supplement: DC180625SupplementaryData.pdf [file DC180625SupplementaryData.pdf]
